# Supplementary material for: Unraveling the role of the lacunar Na7PW11O39 catalyst in the oxidation of terpene alcohols with hydrogen peroxide at room temperature
Source: Royal Society of Chemistry journal article supplement (doi:10.1039/c9nj04725e), 2020-01-01
Supplement: c9nj04725e1.pdf [file c9nj04725e1.pdf]

### Supplementary material

[1SM] Castelo Bandane Vilanculo, Márcio José da Silva, Sukarno Olavo Ferreira, Milena Galdino Teixeira, *A rare oxidation of camphene to acid and aldehyde in the presence of Lacunar Keggin heteropoly salts*, *Molecular Catalysis* 478 (2019) 110589-110595

Received 23 July 2019; Received in revised form 19 August 2019; Accepted 23 August 2019.

#### List of Figures

**Figure SM1.** FT-IR spectra of phosphomolybdic acid and its lacunar sodium salt

**Figure SM2.** FT-IR spectra of silicotungstic acid and its lacunar sodium salt

**Figure SM3.** Powdered XRD patterns of  $\text{Na}_7\text{PMo}_{11}\text{O}_{39}$  lacunar salt and parent  $\text{H}_3\text{PMo}_{12}\text{O}_{40}$

**Figure SM4.** Powdered XRD patterns of  $\text{Na}_8\text{SiW}_{11}\text{O}_{39}$  lacunar salt and parent  $\text{H}_4\text{SiW}_{12}\text{O}_{40}$

**Figure SM5.** TG/DSC curves: precursor  $\text{H}_3\text{PMo}_{12}\text{O}_{40}$  (a) and  $\text{Na}_7\text{PMo}_{11}\text{O}_{39}$  lacunar salt (b)

**Figure SM6.** TG/DSC curves:  $\text{H}_4\text{SiW}_{12}\text{O}_{40}$  precursor (a) and  $\text{Na}_8\text{SiW}_{11}\text{O}_{39}$  lacunar salt (b)

**Figure SM7.** Potentiometric titration curves with *n*-butylamine of  $\text{H}_3\text{PMo}_{12}\text{O}_{40}$  and  $\text{Na}_7\text{PMo}_{11}\text{O}_{39}$  salt

**Figure SM8.** Potentiometric titration curves with *n*-butylamine of  $\text{H}_4\text{SiW}_{12}\text{O}_{40}$  and  $\text{Na}_8\text{SiW}_{11}\text{O}_{39}$  salt

**Figure SM9:** Scanning electronic microscopy images of sodium salts;  $\text{Na}_3\text{PW}_{12}\text{O}_{40}$ ,  $\text{Na}_7\text{PMo}_{11}\text{O}_{39}$  and  $\text{Na}_8\text{SiW}_{11}\text{O}_{39}$

**Figure SM10:** EDS data of  $\text{Na}_3\text{PW}_{12}\text{O}_{40}$ ,  $\text{Na}_7\text{PMo}_{11}\text{O}_{39}$  and  $\text{Na}_8\text{SiW}_{11}\text{O}_{39}$

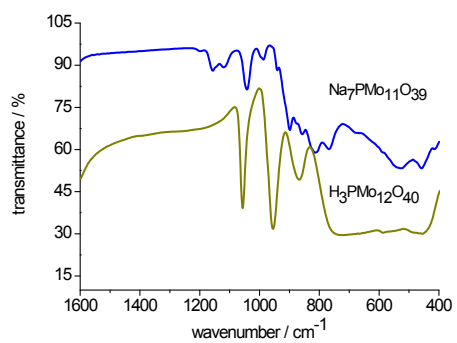

**Figure SM1.** FT-IR spectra of phosphomolybdic acid and its lacunar sodium salt

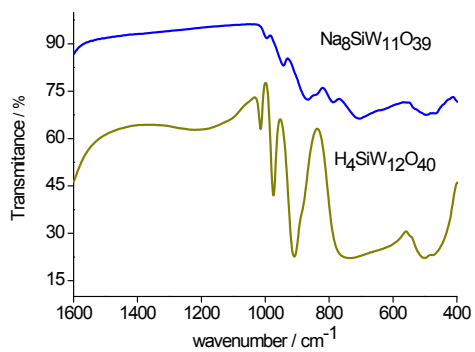

**Figure SM2.** FT-IR spectra of silicotungstic acid and its lacunar sodium salt

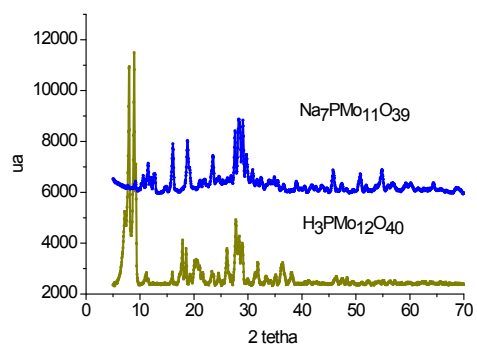

**Figure SM3.** Powdered XRD patterns of Na<sub>7</sub>PMo<sub>11</sub>O<sub>39</sub> lacunar salt and parent H<sub>3</sub>PMo<sub>12</sub>O<sub>40</sub>

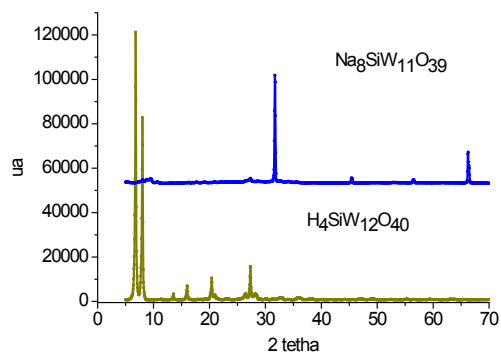

**Figure SM4.** Powdered XRD patterns of  $\text{Na}_8\text{SiW}_{11}\text{O}_{39}$  lacunar salt and parent  $\text{H}_4\text{SiW}_{12}\text{O}_{40}$

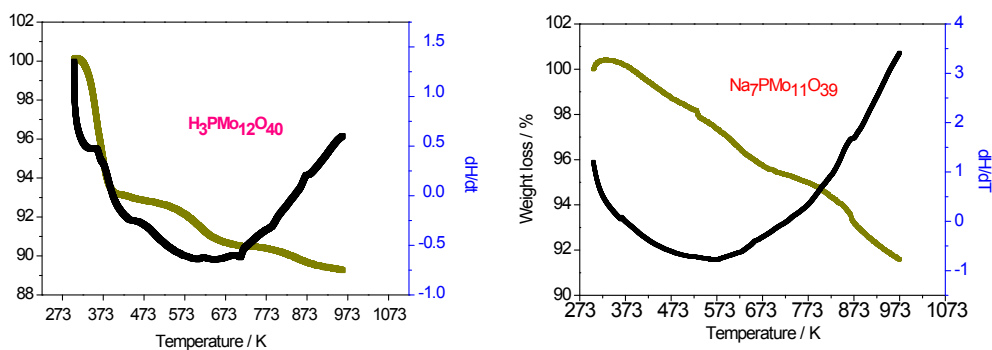

**Figure SM5.** TG/DSC curves: precursor  $\text{H}_3\text{PMo}_{12}\text{O}_{40}$  (a) and  $\text{Na}_7\text{PMo}_{11}\text{O}_{39}$  lacunar salt (b)

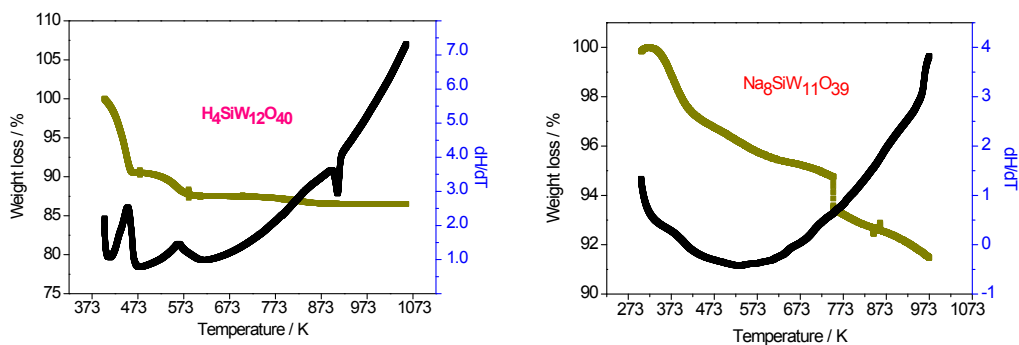

**Figure SM6.** TG/DSC curves: precursor  $\text{H}_4\text{SiW}_{12}\text{O}_{40}$  (a) and  $\text{Na}_8\text{SiW}_{11}\text{O}_{39}$  lacunar salt (b)

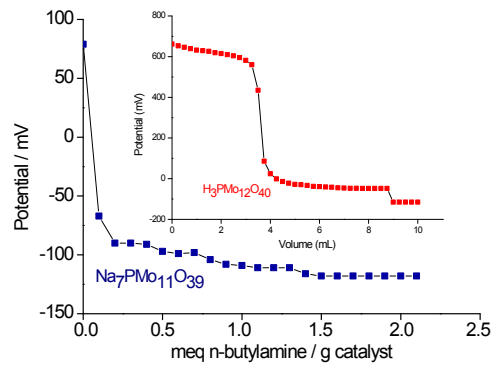

**Figure SM7.** Potentiometric titration curves with *n*-butylamine of  $\text{H}_3\text{PMo}_{12}\text{O}_{40}$  and  $\text{Na}_7\text{PMo}_{11}\text{O}_{39}$  salt

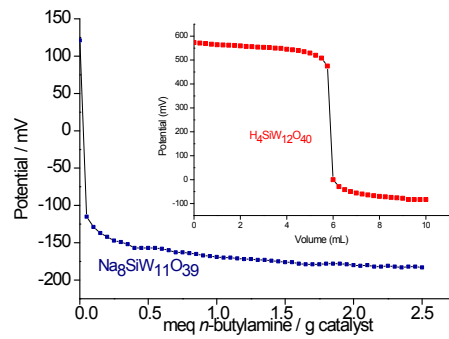

**Figure SM8.** Potentiometric titration curves with *n*-butylamine of  $\text{H}_4\text{SiW}_{12}\text{O}_{40}$  and  $\text{Na}_8\text{SiW}_{11}\text{O}_{39}$  salt

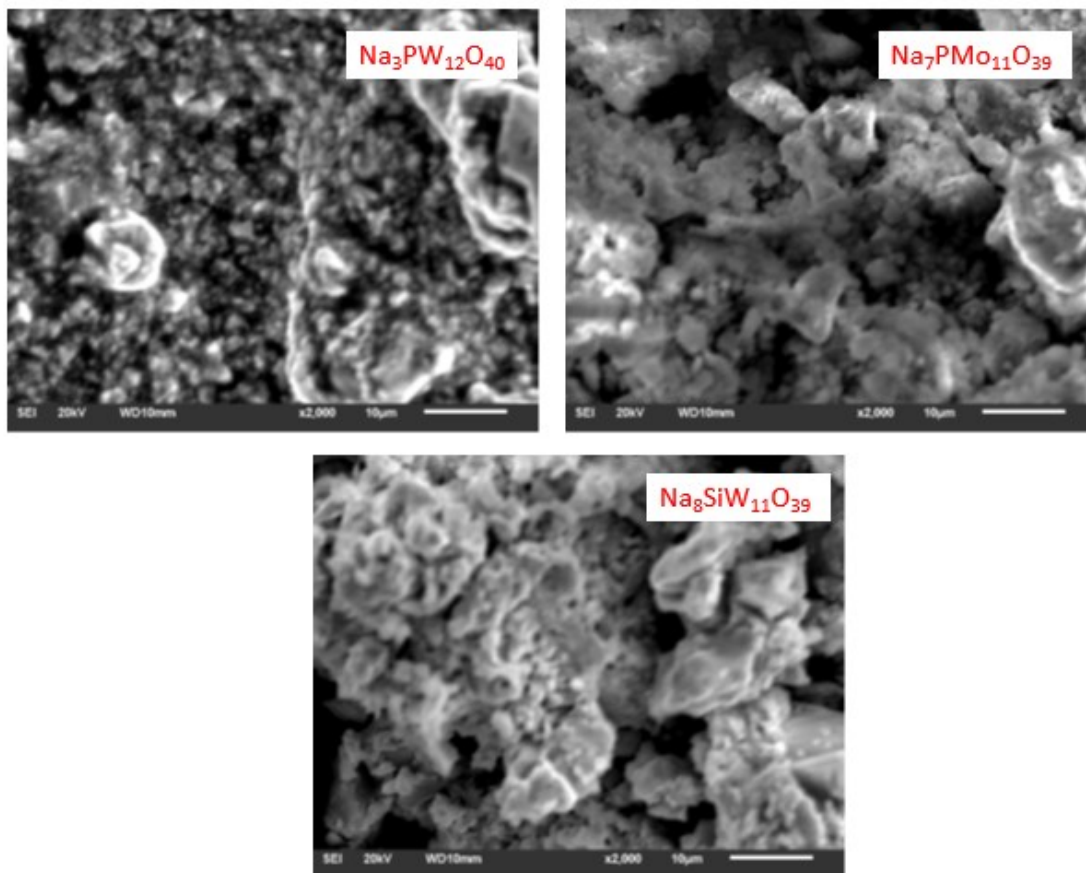

**Figure SM9:** Scanning electronic microscopy images of sodium salts;  $\text{Na}_3\text{PW}_{12}\text{O}_{40}$ ,  $\text{Na}_7\text{PMo}_{11}\text{O}_{39}$  and  $\text{Na}_8\text{SiW}_{11}\text{O}_{39}$

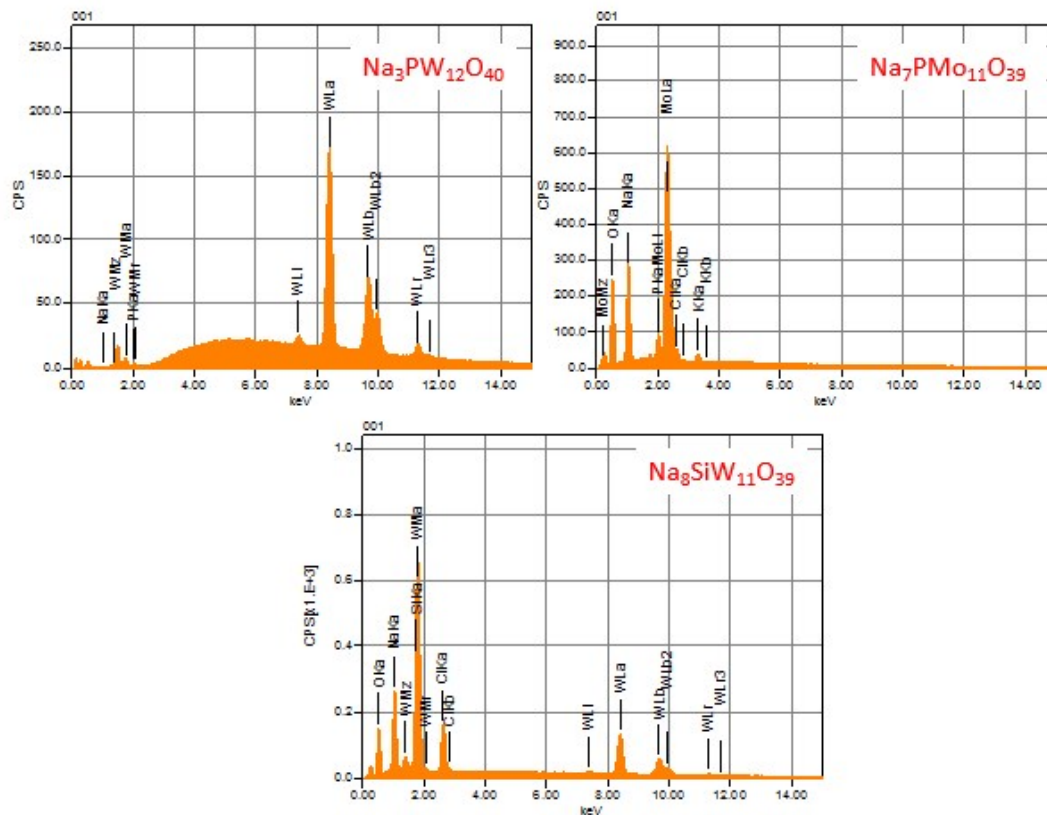

**Figure SM10:** EDS data of  $\text{Na}_3\text{PW}_{12}\text{O}_{40}$ ,  $\text{Na}_7\text{PMo}_{11}\text{O}_{39}$  and  $\text{Na}_8\text{SiW}_{11}\text{O}_{39}$

**Table SM1.** Blank-reactions performed in the absence of the catalyst<sup>a</sup>

| Exp | Temperature<br>(K) | Conversion<br>(%) | Selectivity<br>(%) |         |           |                    |
|-----|--------------------|-------------------|--------------------|---------|-----------|--------------------|
|     |                    |                   | Aldehyde           | Epoxide | Diepoxide | Alkyl<br>peroxides |
| 1   | 298                | 6                 | 0                  | 11      | 0         | 91                 |
| 2   | 308                | 7                 | 0                  | 10      | 0         | 90                 |
| 3   | 318                | 15                | 0                  | 11      | 0         | 89                 |
| 4   | 328                | 18                | 0                  | 11      | 0         | 89                 |
| 5   | 338                | 24                | 0                  | 10      | 0         | 90                 |

<sup>a</sup>Reaction conditions: nerol (2.75 mmol);  $\text{H}_2\text{O}_2$  (5.50 mmol); time (4 h);  $\text{CH}_3\text{CN}$  (10 mL)
